1

## Robust estimation of sulcal morphology

2

Christopher R. Madan

3

School of Psychology

4

University of Nottingham

5

Nottingham, United Kingdom

6

7

Corresponding author:

8

Christopher R. Madan

9

School of Psychology, University of Nottingham

10

Nottingham, NG7 2RD, United Kingdom

11

[christopher.madan@nottingham.ac.uk](mailto:christopher.madan@nottingham.ac.uk)

12 Abstract

13 While it is well established that cortical morphology differs in relation to a variety of  
14 inter-individual factors, it is often characterized using estimates of volume, thickness,  
15 surface area, or gyrification. Here we developed a computational approach for  
16 estimating sulcal width and depth that relies on cortical surface reconstructions output  
17 by FreeSurfer. While other approaches for estimating sulcal morphology exist, studies  
18 often require the use of multiple brain morphology programs that have been shown to  
19 differ in their approaches to localize sulcal landmarks, yielding morphological  
20 estimates based on inconsistent boundaries. To demonstrate the approach, sulcal  
21 morphology was estimated in three large sample of adults across the lifespan, in  
22 relation to aging. A fourth sample is additionally used to estimate test-retest reliability  
23 of the approach. This toolbox is now made freely available as supplemental to this  
24 paper: <https://cmadan.github.io/calcSulc/>.

25

26 **Keywords:** sulcal width; sulcal depth; age; cortical structure; atrophy; gyrification;  
27 cerebral sulci

## 28 Robust estimation of sulcal morphology

### 29 **1 Introduction**

30 Cortical structure differs between individuals. It is well known that cortical thickness  
31 generally decreases with age (Fjell et al., 2009; Hogstrom et al., 2013; Hutton et al., 2009;  
32 Lemaitre et al., 2012; Madan & Kensinger, 2016, 2018; McKay et al., 2014; Salat et al.,  
33 2004; Sowell et al., 2003, 2007); however, a more visually prominent difference is the  
34 widening of sulci, sometimes described as “sulcal prominence” (Coffey et al., 1992;  
35 Drayer, 1988; Jacoby et al., 1980; Laffey et al., 1984; Tomlinson et al., 1968; Yue et al.,  
36 1997). In the literature, this measure has been referred to using a variety of names,  
37 including sulcal width, span, dilation, and enlargement, as well as fold opening. With  
38 respect to aging and brain morphology, sulcal width has been assessed qualitatively by  
39 clinicians as an index of cortical atrophy (Coffey et al., 1992; Drayer, 1988; Laffey et al.,  
40 1984; Pasquier et al., 1996; Scheltens et al., 1997; Tomlinson et al., 1968). An illustration  
41 of age-related differences in sulcal morphology is shown in Figure 1.

42 Using quantitative approaches, sulcal width has been shown to increase with age  
43 (Kochunov et al., 2005, 2008; Liu et al., 2010, 2013) likely relating to subsequent  
44 findings of age-related decreases in cortical gyrification (Cao et al., 2017; Hogstrom et  
45 al., 2013; Madan & Kensinger, 2016, 2018; Madan, 2018a). Sulcal widening has also  
46 been shown to be associated with decreases in cognitive abilities (Liu et al., 2011) and  
47 physical activity (Lamont et al., 2014). With respect to clinical conditions, increased  
48 sulcal width has been found in dementia patients relative to healthy controls  
49 (Andersen et al., 2015; Hamelin et al., 2015; Huckman et al., 1975; Liu et al., 2012; Ming  
50 et al., 2015; Plochanski & Østergaard, 2016; Reiner et al., 2012), as well as with  
51 schizophrenia patients (Largen et al., 1984; Palaniyappan et al., 2015; Rieder et al., 1979)  
52 and mood disorders (Elkis et al., 1995).

53 One of the most common programs for conducting cortical surface analyses is  
54 FreeSurfer (Fischl, 2012). Unfortunately, though FreeSurfer reconstructs cortical  
55 surfaces, it does not estimate sulcal width or depth, leading researchers to use

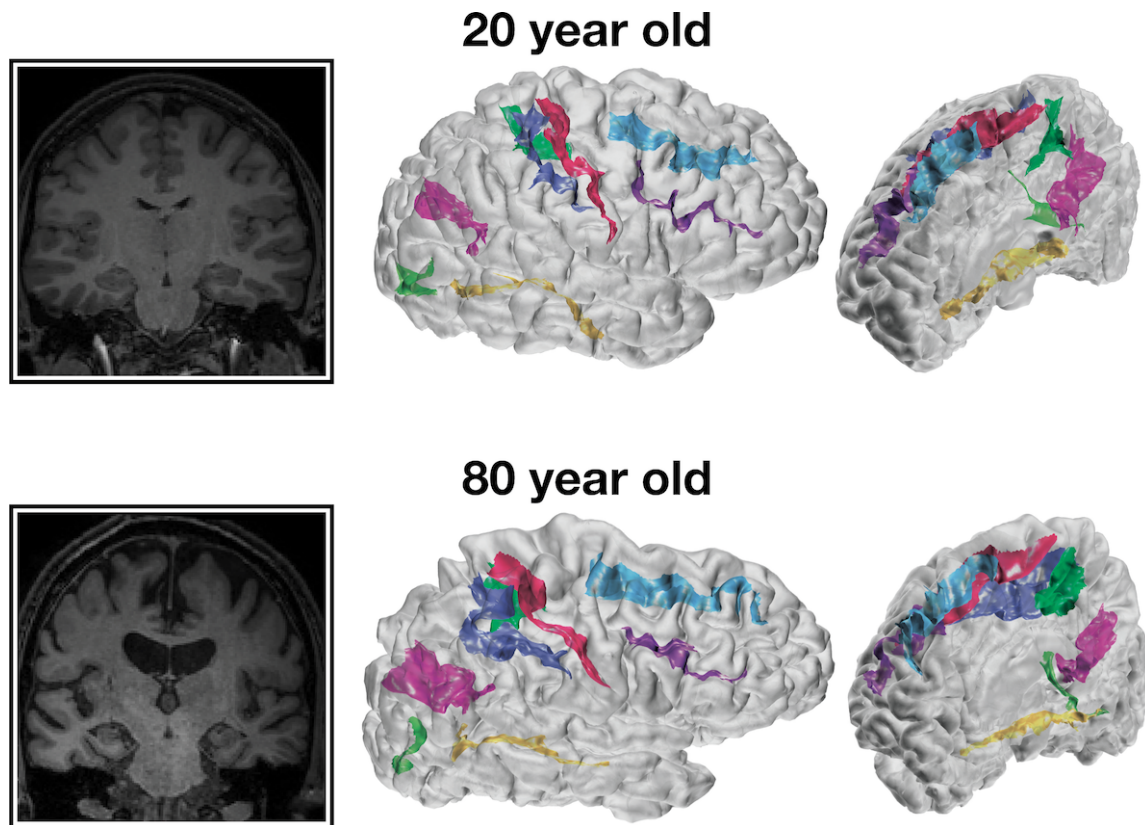

Figure 1. Representative coronal slices and cortical surfaces with sulcal identification for 20- and 80-year-old individuals.

56 FreeSurfer along with another surface analysis program, BrainVISA (Kochunov et al.,  
57 2012; Mangin, Rivière, et al., 2004; Mangin, Riviere, et al., 2004; Rivière et al., 2002), to  
58 characterize cortical thickness along with sulcal morphology (e.g. Cai et al., 2017;  
59 Lamont et al., 2014; Liu et al., 2011, 2013; Pizzagalli et al., 2017). While this combination  
60 allows for the estimation of sulcal morphology in addition to standard measures such  
61 as cortical thickness, FreeSurfer and BrainVISA rely on different anatomical landmarks  
62 (Mikhael et al., 2018) which can yield differences in their resulting cortical surface  
63 reconstructions (Lee et al., 2006). Admittedly, determining the boundaries for an  
64 individual sulcus and incorporating individual cortical variability is difficult (John et  
65 al., 2006; Mikhael et al., 2018; Ono et al., 1990; Welker, 1990). While an ennumerate  
66 amount of other methods have already been proposed to identify and characterize  
67 sulcal morphology (e.g., Andreasen et al., 1994; Auzias et al., 2015; Beeston & Taylor,  
68 2000; Behnke et al., 2003; Eskildsen et al., 2005; Im et al., 2010; Jones et al., 2000; Le

69 Goualher et al., 1996, 1998; Li et al., 2008; Lohmann & von Cramon, 2000; Lohmann et  
70 al., 2008; Nowinski et al., 1996; Oguz et al., 2008; Perrot et al., 2011; Royackkers et al.,  
71 1999; Thompson et al., 1996; Vaillant & Davatzikos, 1997; Yun et al., 2013), ultimately  
72 these all are again using different landmarks than FreeSurfer uses for cortical  
73 parcellations (i.e., volume, thickness, surface area, gyrification). Note that, though  
74 FreeSurfer itself does compute sulcal maps, these are computed as normalized depths,  
75 not in real-world units (e.g. Kippenhan et al., 2005), furthermore, these are also  
76 independent of sulcal width information.

77 Here we describe a procedure for estimating sulcal morphology and report  
78 age-related differences in sulcal width and depth using three large samples of adults  
79 across the lifespan: two of these datasets are from Western samples, Dallas Lifespan  
80 Brain Study (DLBS) and Open Access Series of Imaging Studies (OASIS), as well as one  
81 East Asian sample, Southwest University Adult Lifespan (SALD), as potential  
82 differences between populations have been relatively understudied (Leong et al., 2017;  
83 Madan, 2017). To further validate the method, test-retest reliability was also assessed  
84 using a sample of young adults who were scanned ten times within the span of a  
85 month (Chen et al., 2015; Madan & Kensinger, 2017b). All four of these datasets are  
86 open-access and have sufficient sample sizes to be suitable for brain morphology  
87 research (Madan, 2017). This procedure has been implemented as a MATLAB toolbox,  
88 `calcSulc`, that calculates sulcal morphology—both width and depth—using files  
89 generated as part of the standard FreeSurfer cortical reconstruction and parcellation  
90 pipeline. This toolbox is now made freely available as supplemental to this paper:  
91 <https://cmadan.github.io/calcSulc/>.

## 92 **2 Materials and Methods**

### 93 **2.1 Datasets**

94 **OASIS.** This dataset consisted of 314 healthy adults (196 females), aged 18–94, from  
95 the Open Access Series of Imaging Studies (OASIS) cross-sectional dataset

96 (<http://www.oasis-brains.org>) (Marcus et al., 2007). Participants were  
97 recruited from a database of individuals who had (a) previously participated in MRI  
98 studies at Washington University, (b) were part of the Washington University  
99 Community, or (c) were from the longitudinal pool of the Washington University  
100 Alzheimer Disease Research Center. Participants were screened for neurological and  
101 psychiatric issues; the Mini-Mental State Examination (MMSE) and Clinical Dementia  
102 Rating (CDR) were administered to participants aged 60 and older. To only include  
103 healthy adults, participants with a CDR above zero were excluded; all remaining  
104 participants scored 25 or above on the MMSE. Multiple T1 volumes were acquired  
105 using a Siemens Vision 1.5 T with a MPRAGE sequence; only the first volume was used  
106 here. Scan parameters were: TR=9.7 ms; TE=4.0 ms; flip angle=10°;  
107 voxel size=1.25×1×1 mm. Age-related comparisons for volumetric and fractal  
108 dimensionality measures from the OASIS dataset were previously reported in Madan  
109 and Kensinger (2017a), Madan and Kensinger (2018), and Madan (2018b)<sup>1</sup>.

110 **DLBS.** This dataset consisted of 315 healthy adults (198 females), aged 20–89, from  
111 wave 1 of the Dallas Lifespan Brain Study (DLBS), made available through the  
112 International Neuroimaging Data-sharing Initiative (INDI) (Mennes et al., 2013) and  
113 hosted on the Neuroimaging Informatics Tools and Resources Clearinghouse (NITRC)  
114 (Kennedy et al., 2016)  
115 ([http://fcon\\_1000.projects.nitrc.org/indi/retro/dlbs.html](http://fcon_1000.projects.nitrc.org/indi/retro/dlbs.html)).  
116 Participants were screened for neurological and psychiatric issues. No participants in  
117 this dataset were excluded *a priori*. All participants scored 26 or above on the MMSE.  
118 T1 volumes were acquired using a Philips Achieva 3 T with a MPRAGE sequence. Scan  
119 parameters were: TR=8.1 ms; TE=3.7 ms; flip angle=12°; voxel size=1×1×1 mm. See  
120 Kennedy et al. (2015) and Chan et al. (2014) for further details about the dataset.  
121 Age-related comparisons for volumetric and fractal dimensionality measures from the  
122 DLBS dataset were previously reported in Madan and Kensinger (2017a), Madan and

---

<sup>1</sup>Note that analyses reported in these previous papers were based on preprocessing in FreeSurfer 5.3.0, rather than FreeSurfer 6.0.

123 Kensinger (2018), and Madan (2018b) <sup>1</sup>.

124 **SALD.** This dataset consisted of 483 healthy adults (303 females), aged 19–80, from  
125 the Southwest University Adult Lifespan Dataset (SALD) (Wei et al., 2018), also made  
126 available through INDI and hosted on NITRC  
127 ([http://fcon\\_1000.projects.nitrc.org/indi/retro/sald.html](http://fcon_1000.projects.nitrc.org/indi/retro/sald.html)). No  
128 participants in this dataset were excluded *a priori*. T1 volumes were acquired using a  
129 Siemens Trio 3 T with a MPRAGE sequence. Scan parameters were: TR=1.9 s;  
130 TE=2.52 ms; flip angle=9°; voxel size=1×1×1 mm.

131 **CCBD.** This dataset consisted of 30 healthy adults (15 females), aged 20–30, from the  
132 Center for Cognition and Brain Disorders (CCBD) at Hangzhou Normal University  
133 (Chen et al., 2015). Each participant was scanned for 10 sessions, occurring 2-3 days  
134 apart over a one-month period. No participants in this dataset were excluded *a priori*.  
135 T1 volumes were acquired using a SCANNER with a FSPGR sequence. Scan  
136 parameters were: TR=8.06 ms; TE=3.1 ms; flip angle=8°; voxel size: 1×1×1 mm. This  
137 dataset is included as part of the Consortium for Reliability and Reproducibility  
138 (CoRR) (Zuo et al., 2014) as HNU1. Test-retest comparisons for volumetric and fractal  
139 dimensionality measures from the CCBD dataset were previously reported in Madan  
140 and Kensinger (2017b)<sup>1</sup>.

## 141 **2.2 Procedure**

142 Data were analyzed using FreeSurfer 6.0  
143 (<https://surfer.nmr.mgh.harvard.edu>) on a machine running Red Hat  
144 Enterprise Linux (RHEL) 7.4. FreeSurfer was used to automatically volumetrically  
145 segment and parcellate cortical and subcortical structures from the T1-weighted  
146 images (Fischl, 2012; Fischl & Dale, 2000) FreeSurfer's standard pipeline was used (i.e.,  
147 `recon-all`). No manual edits were made to the surface meshes, but surfaces were  
148 visually inspected. Cortical thickness is calculated as the distance between the white



149 matter surface (white-gray interface) and pial surface (gray-CSF interface) .  
150 Gyrfication was also calculated using FreeSurfer, as described in Schaer et al. (2012).  
151 Cortical regions were parcellated based on the Destrieux et al. (2010) atlas, also part of  
152 the standard FreeSurfer analysis pipeline.

### 153 3 Calculation

154 Here we outline a novel, simple yet robust, automated approach for estimating sulcal  
155 width and depth, based on intermediate files generated as part of the standard  
156 FreeSurfer analysis pipeline. This procedure and functionality has been implemented  
157 in an accompanying MATLAB toolbox, `calcSulc`. The toolbox is supplemental  
158 material to this paper and is made freely available:  
159 <https://cmadan.github.io/calcSulc/>.

160 For each individual sulcus (for each hemisphere and participant), the following  
161 approach was used to characterize the sulcal morphology. The procedure has been  
162 validated and is supported for the following sulci: central, post-central, superior  
163 frontal, inferior frontal, parieto-occipital, occipito-temporal, middle occipital and  
164 lunate, and marginal part of the cingulate (`S_central`, `S_postcentral`,  
165 `S_front_sup`, `S_front_inf`, `S_parieto_occipital`,  
166 `S_oc-temp_med&Lingual`, `S_oc_middle&Lunatus`, `S_cingul-Marginalis`).  
167 All of the sulci are labeled in Figure 2.

168 First the pial surface and Destrieux et al. (2010) parcellation labels were read into  
169 MATLAB by using the FreeSurfer-MATLAB toolbox provided alongside FreeSurfer  
170 (`calcSulc_load`), this consists of the `?h.pial` (FreeSurfer cortical surface mesh)  
171 `?h.aparc.a2009s.annot` (FreeSurfer parcellation annotation) files. Using this, the  
172 faces associated with the individual sulcus were isolated as a 3D mesh  
173 (`calcSulc_isolate`).

174 The width of each sulcus (`calcSulc_width`) was calculated by determining  
175 which vertices lay on the boundary of the sulcus and the adjacent gyrus. An iterative  
176 procedure was then used to determine the 'chain' of edges that would form a



177 contiguous edge-loop that encircle the sulcal region (`calcSulc_getEdgeLoop`). This  
178 provided an exhaustive list of all vertices that were mid-way between the peak of the  
179 respective adjacent gyri and depth of the sulcus itself. For each vertex in this edge-loop,  
180 the nearest point in 3D space that was *not* neighbouring in the loop was determined,  
181 with the goal of finding the nearest vertex in the edge that was on the opposite side of  
182 the sulcus—i.e., a line between these two vertices would ‘bridge’ across the sulcus. Since  
183 these nearest vertices in the edge loop are not necessarily the nearest vertex along the  
184 opposite sulcus wall, an exhaustive search (walk) was performed, moving up to a 4  
185 edges from the initially determined nearest vertex (configurable as  
186 `options.setWidthWalk`). The sulcal width was then taken as the median of these  
187 distances that bridged across the sulcus.

188 The depth of each sulcus (`calcSulc_depth`) additionally used FreeSurfer’s  
189 sulcal maps (`?h.sulc`) to determine the relative inflections in the surface mesh, which  
190 would be in alignment with the gyral crown. The deepest points of the sulcus, i.e., the  
191 sulcal fundus, were taken as the 100 vertices within the sulcus with the lowest values  
192 in the sulcal map. For these 100 vertices, the shortest distance to the smoothed  
193 enclosing surface was calculated (generated by FreeSurfer’s built-in gyrification  
194 analysis [`?h.pial-outer-smoothed`], Schaer et al., 2012), and the median of these  
195 was then taken as the sulcal depth.

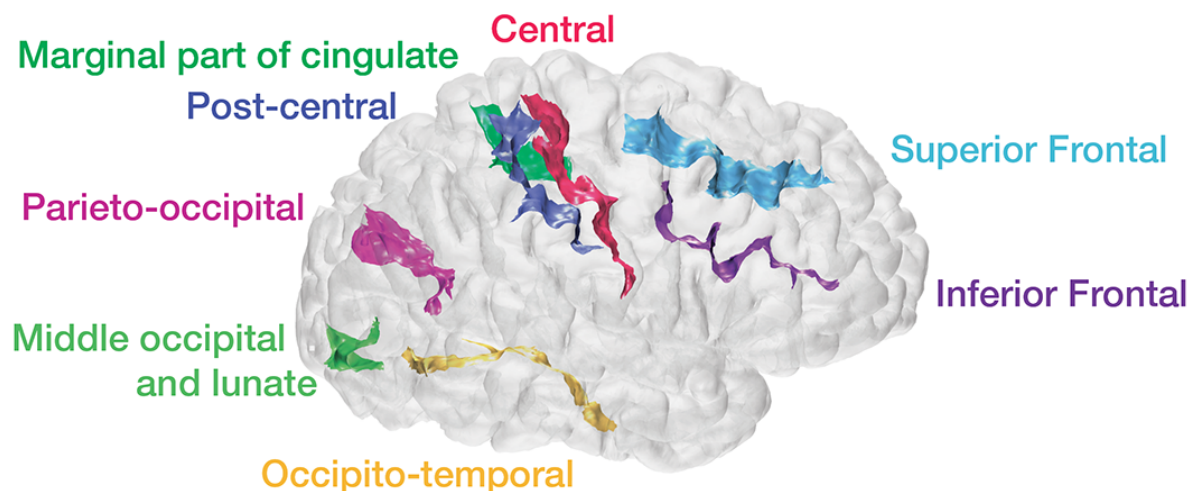

Figure 2. Example cortical surface with estimated sulci identified and labelled.

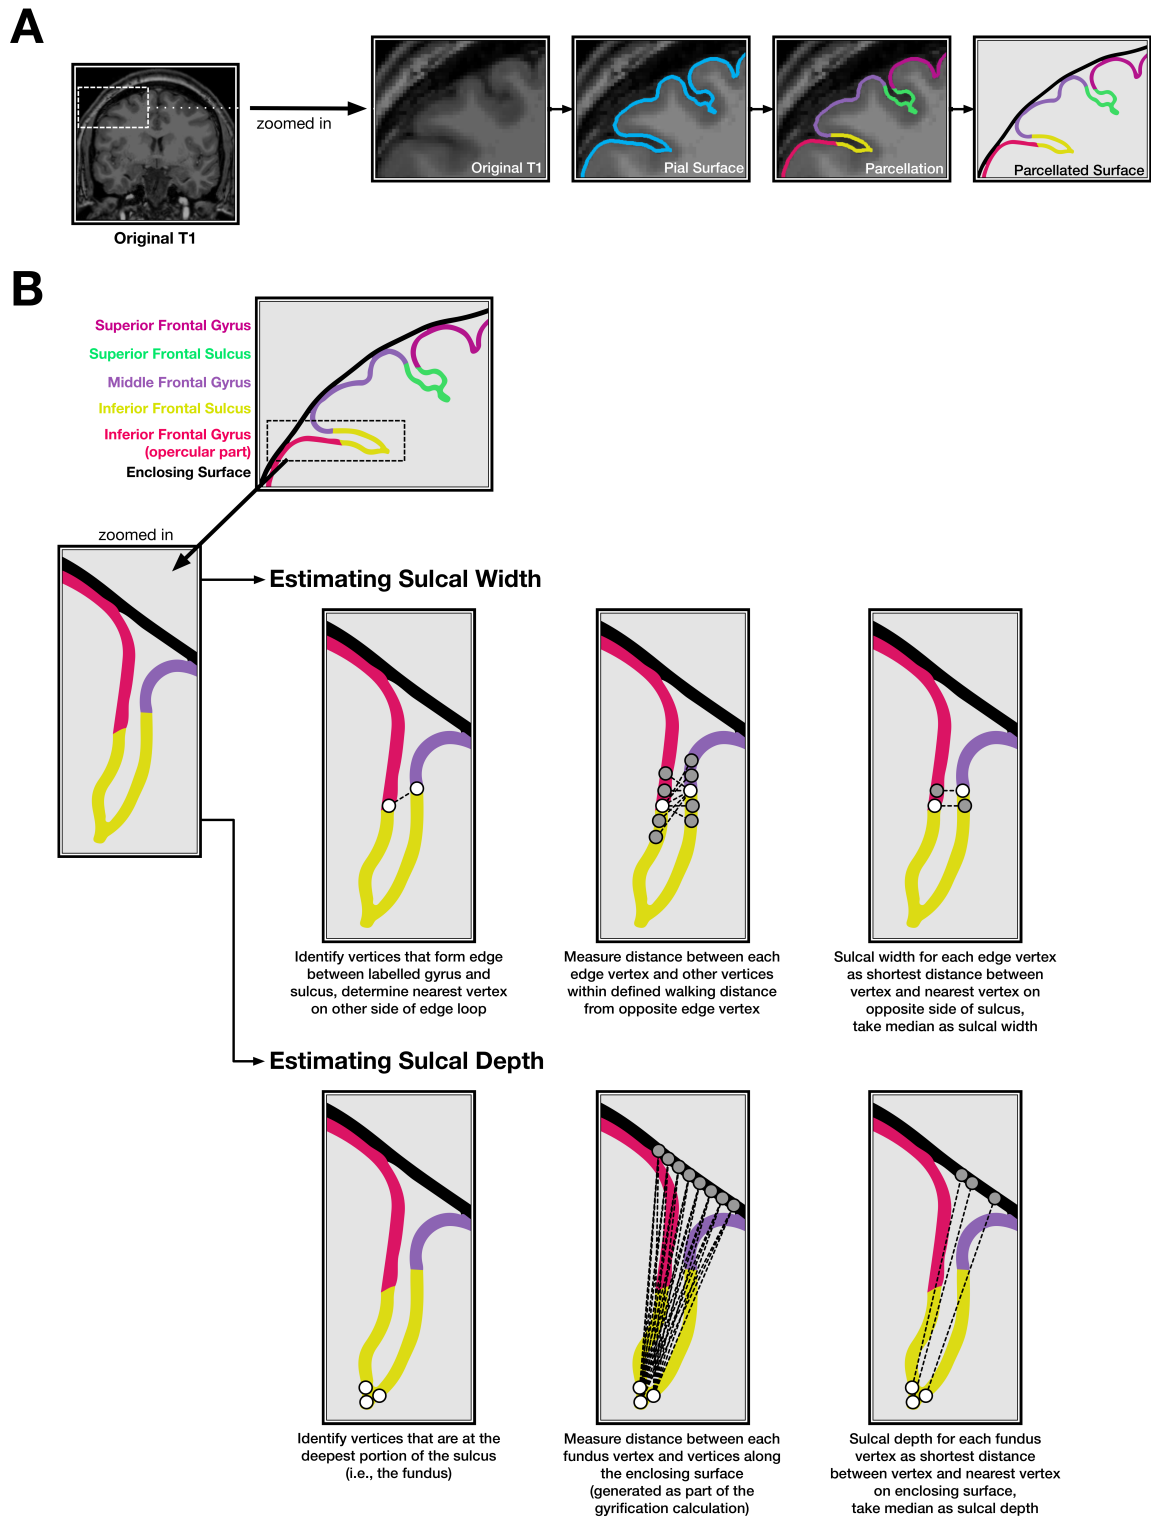

Figure 3. Illustration of the sulcal morphology method. (A) Cortical surface estimation and sulcal identification, as output from FreeSurfer. (B) Sulcal width and depth estimation procedure. Note that the surface mesh and estimation algorithm use many more vertices than shown here.

196 Sulcal morphology, with and depth, was estimated for eight major sulci in each  
197 hemisphere: central, post-central, superior frontal, inferior frontal, parieto-occipital,  
198 occipito-temporal, middle occipital and lunate, and marginal part of the cingulate  
199 (`S_central`, `S_postcentral`, `S_front_sup`, `S_front_inf`,  
200 `S_parieto_occipital`, `S_oc-temp_med&Lingual`, `S_oc_middle&Lunatus`,  
201 `S_cingul-Marginalis`). Preliminary analyses additionally included superior and  
202 inferior temporal sulci and intraparietal sulcus but these were removed from further  
203 analysis when the sulci width estimation was found to fail to determine a closed  
204 boundary edge-loop at an unacceptable rate ( $> 10\%$ ) for at least one hemisphere. This  
205 edge boundary determination failed when parcellated regions were labeled by  
206 FreeSurfer to comprise at least two discontinuous regions, such that they could not be  
207 identified using a single edge loop. Nonetheless, sulcal measures failed to be estimated  
208 for some participants, resulting in final samples of 310 adults from the OASIS dataset,  
209 312 adults from the DLBS dataset, 481 adults from the SALD dataset, and 30 adults  
210 from the CCBD dataset.

### 211 3.1 Test-retest reliability

212 Test-retest reliability was assessed as intraclass correlation coefficient (*ICC*), which can  
213 be used to quantify the relationship between multiple measurements (Asendorpf &  
214 Wallbott, 1979; Bartko, 1966; Chen et al., 2018; Hallgren, 2012; Koo & Li, 2016; Madan &  
215 Kensinger, 2017b; Rajaratnam, 1960; Shrout & Fleiss, 1979). McGraw and Wong (1996)  
216 provide a comprehensive review of the various *ICC* formulas and their applicability to  
217 different research questions. *ICC* was calculated as the one-way random effects model  
218 for the consistency of single measurements, i.e.,  $ICC(1, 1)$ . As a general guideline,  
219 *ICC* values between .75 and 1.00 are considered 'excellent,' .60-.74 is 'good,' .40-.59 is  
220 'fair,' and below .40 is 'poor' (Cicchetti, 1994).

## 221 4 Results & Discussion

### 222 4.1 Age-related differences in sulcal morphology

223 Scatter plots showing the relationships between each individual sulcal width and  
 224 depth and age, for the OASIS dataset, are shown in Figure 4; the corresponding  
 225 correlations for all datasets are shown in Tables 1 and 2. The width and depth of the  
 226 central and post-central sulci appear to be particularly correlated with age, with wider  
 227 and shallower sulci in older adults. Age-related differences in sulcal width and depth  
 228 and generally present in other sulci as well, but are generally weaker.

229 Age-related relationships for each sulcus were relatively consistent between the  
 230 two Western lifespan datasets (OASIS and DLBS), but age-related differences in sulcal  
 231 width (but not depth) were markedly weaker in the East Asian lifespan dataset (SALD).  
 232 This finding will need to be studied further, but may be related to gross differences in  
 233 anatomical structure (Kochunov et al., 2003; Tang et al., 2010). Importantly, test-retest  
 234 reliability,  $ICC(1, 1)$ , was particularly good for the sulcal depth across individual sulci.

| Sulci Name                  | FreeSurfer Label†     | Hemi. | OASIS    | DLBS     | SALD     | CCBD       |                 |
|-----------------------------|-----------------------|-------|----------|----------|----------|------------|-----------------|
|                             |                       |       | $r(Age)$ | $r(Age)$ | $r(Age)$ | $ICC(1,1)$ | 95% CI of ICC   |
| Central                     | S_central             | L     | .586     | .486     | .322     | .858       | [ 0.785, 0.918] |
|                             |                       | R     | .632     | .523     | .294     | .842       | [ 0.764, 0.908] |
| Post-central                | S_postcentral         | L     | .413     | .391     | .198     | .764       | [ 0.660, 0.858] |
|                             |                       | R     | .460     | .436     | .213     | .864       | [ 0.794, 0.922] |
| Superior Frontal            | S_front_sup           | L     | .281     | .421     | .055     | .797       | [ 0.703, 0.880] |
|                             |                       | R     | .205     | .291     | .035     | .843       | [ 0.764, 0.909] |
| Inferior Frontal            | S_front_inf           | L     | .217     | .323     | -.037    | .775       | [ 0.675, 0.865] |
|                             |                       | R     | .043     | .222     | -.036    | .831       | [ 0.748, 0.901] |
| Parieto-occipital           | S_parieto_occipital   | L     | .348     | .279     | .145     | .616       | [ 0.486, 0.753] |
|                             |                       | R     | .257     | .357     | .213     | .682       | [ 0.561, 0.802] |
| Occipito-temporal           | S_oc-temp_med&Lingual | L     | .227     | .270     | -.055    | .660       | [ 0.535, 0.786] |
|                             |                       | R     | .168     | .189     | .017     | .692       | [ 0.572, 0.808] |
| Middle occipital and lunate | S_oc_middle&Lunatus   | L     | .306     | .271     | .145     | .605       | [ 0.474, 0.744] |
|                             |                       | R     | .212     | .177     | .023     | .625       | [ 0.496, 0.760] |
| Marginal part of cingulate  | S_cingul-Marginalis   | L     | .340     | .275     | .075     | .783       | [ 0.685, 0.871] |
|                             |                       | R     | .430     | .382     | .161     | .757       | [ 0.651, 0.853] |
| <i>Mean</i>                 |                       |       | .636     | .592     | .227     | .907       | [ 0.856, 0.947] |

Table 1

*Correlations between sulcal width and age for each sulci and hemisphere, for each of the three lifespan datasets examined. Test-retest reliability,  $ICC(1, 1)$ , is also included from the CCBD dataset. †FreeSurfer labels in version 6.0; labels are named slightly different in version 5.3.*

**A. Sulcal Width**

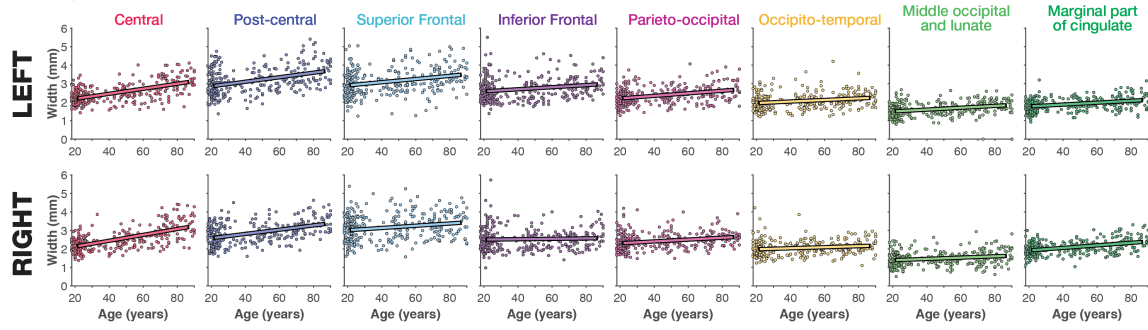

**B. Sulcal Depth**

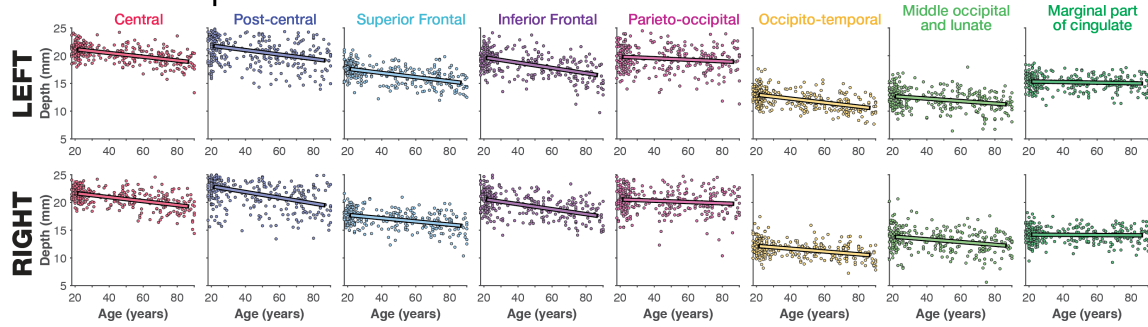

Figure 4. Relationship between (A) sulcal depth and (B) width for each of the sulci examined, based on the OASIS dataset.

| Sulci Name                  | FreeSurfer Label†     | Hemi. | OASIS           | DLBS            | SALD            | CCBD       |                 |
|-----------------------------|-----------------------|-------|-----------------|-----------------|-----------------|------------|-----------------|
|                             |                       |       | $r(\text{Age})$ | $r(\text{Age})$ | $r(\text{Age})$ | $ICC(1,1)$ | 95% CI of ICC   |
| Central                     | S_central             | L     | -.517           | -.205           | -.346           | .848       | [ 0.772, 0.912] |
|                             |                       | R     | -.505           | -.256           | -.348           | .860       | [ 0.789, 0.919] |
| Post-central                | S_postcentral         | L     | -.371           | -.264           | -.268           | .965       | [ 0.944, 0.981] |
|                             |                       | R     | -.436           | -.246           | -.330           | .890       | [ 0.831, 0.937] |
| Superior Frontal            | S_front_sup           | L     | -.523           | -.454           | -.397           | .899       | [ 0.844, 0.943] |
|                             |                       | R     | -.413           | -.465           | -.444           | .886       | [ 0.825, 0.935] |
| Inferior Frontal            | S_front_inf           | L     | -.517           | -.490           | -.491           | .932       | [ 0.893, 0.962] |
|                             |                       | R     | -.496           | -.480           | -.490           | .915       | [ 0.868, 0.952] |
| Parieto-occipital           | S_parieto_occipital   | L     | -.145           | -.093           | -.241           | .979       | [ 0.966, 0.989] |
|                             |                       | R     | -.124           | .059            | -.229           | .970       | [ 0.952, 0.984] |
| Occipito-temporal           | S_oc-temp_med&Lingual | L     | -.509           | -.323           | -.263           | .953       | [ 0.926, 0.974] |
|                             |                       | R     | -.404           | -.316           | -.281           | .913       | [ 0.864, 0.951] |
| Middle occipital and lunate | S_oc_middle&Lunatus   | L     | -.290           | -.167           | -.150           | .949       | [ 0.919, 0.972] |
|                             |                       | R     | -.288           | -.120           | -.132           | .922       | [ 0.879, 0.956] |
| Marginal part of cingulate  | S_cingul-Marginalis   | L     | -.092           | -.035           | -.268           | .952       | [ 0.925, 0.974] |
|                             |                       | R     | -.032           | -.017           | -.156           | .918       | [ 0.872, 0.954] |
| Mean                        |                       |       | -.465           | -.645           | -.600           | .972       | [ 0.955, 0.985] |

Table 2

Correlations between sulcal depth and age for each sulci and hemisphere, for each of the three lifespan datasets examined. Test-retest reliability,  $ICC(1,1)$ , is also included from the CCBD dataset. †FreeSurfer labels in version 6.0; labels are named slightly different in version 5.3.

235 To obtain a coarse summary measure across sulci, we averaged the sulcal width  
236 across the 16 individual sulci for each individual, and with each dataset, and examined  
237 the relationship between mean sulcal width with age. These correlations, shown in  
238 Table 1, indicate that the mean sulcal width was generally a better indicator of  
239 age-related differences in sulcal morphology than individual sulci, and had increased  
240 test-retest reliability. Mean sulcal depth was similarly more sensitive to age-related  
241 differences than for an individual sulcus (e.g., it is unclear why the relationship  
242 between age and width of the central sulcus differed between samples) and the  
243 magnitude of this relationship was more consistent across datasets. Reliability was  
244 even higher for mean sulcal depth than mean sulcal width.

## 245 4.2 Comparison with other age-related structural differences

246 Within each dataset, mean sulcal depth and width correlated with age, as shown in  
247 Tables 1 and 2. Of course, other measures of brain morphology also differ with age,  
248 such as mean (global) cortical thickness [OASIS:  $r(308) = -.793, p < .001$ ; DLBS:  
249  $r(310) = -.759, p < .001$ ; SALD:  $r(479) = -.642, p < .001$ ]. Additionally, volume of the  
250 third ventricle (ICV-corrected) has been previously shown to significantly related to  
251 age (Madan & Kensinger, 2017a; Walhovd et al., 2011), and was found to be true in  
252 each of the examined lifespan datasets here as well [OASIS:  $r(308) = .665, p < .001$ ;  
253 DLBS:  $r(310) = .677, p < .001$ ; SALD:  $r(479) = .328, p < .001$ ]. Previous studies have  
254 demonstrated that both of these measures are robust estimates of age-related  
255 differences in brain structure.

256 To test if these mean sulcal measures served as distinct measures of age-related  
257 differences in brain morphology, beyond those provided by other measures, such as  
258 mean cortical thickness and volume of the third ventricle, we conducted partial  
259 correlations that controlled for these two other measures of age-related atrophy. Mean  
260 sulcal width [OASIS:  $r_p(306) = .188, p < .001$ ; DLBS:  $r_p(308) = .177, p = .002$ ; SALD:  
261  $r(477) = .003, p = .96$ ] and depth [OASIS:  $r_p(306) = -.443, p < .001$ ; DLBS:  
262  $r_p(308) = -.397, p < .001$ ; SALD:  $r_p(477) = -.534, p < .001$ ] both explained unique



263 variance in relation to age. Thus, even though more established measures of  
264 age-related differences in brain morphology were replicated here, the additional sulcal  
265 measures captured aspects of aging that are not accounted for by these extant  
266 measures, indicating that these sulcal measures are worth pursuing further and are not  
267 redundant with other measures of brain structure. Providing additional support for  
268 this, mean sulcal width and depth were only weakly related to each other [OASIS:  
269  $r(308) = -.192, p < .001$ ; DLBS:  $r(310) = .092, p = .104$ ; SALD:  $r(479) = .119, p = .009$ ].

270 As with the individual sulci measures, we did observe a difference between  
271 samples where some age-related measures were less sensitive in the East Asian lifespan  
272 sample (SALD), here in the ventricle volume correlation and the unsurprisingly weaker  
273 age relationship in the partial correlation using sulcal width. These sample differences  
274 are puzzling, though there is a general correspondence between the two Western  
275 samples. Given that much of the literature is also based on Western samples, we think  
276 further research with East Asian samples, and particularly comparing samples with the  
277 same analysis pipeline, is necessary to shed further light on this initial finding.

## 278 5 Conclusion

279 Differences in sulcal width and depth are quite visually prominent, but are not often  
280 quantified when examining individual differences in cortical structure. Here we  
281 examined age-related differences in both sulcal measures as a proof-of-principle to  
282 demonstrate the utility of the calcSulc toolbox that accompanies this paper and is  
283 designed to closely compliment the standard FreeSurfer pipeline. This allows for the  
284 additional measurement of sulcal morphology, to add to the extant measures of brain  
285 morphology such as cortical thickness, area, and gyrification. Critically, this approach  
286 uses the same landmarks and boundaries as in the Destrieux et al. (2010) parcellation  
287 atlas, in contrast to all previous approaches to characterize sulcal features. This toolbox  
288 is now made freely available as supplemental to this paper:

289 <https://cmadan.github.io/calcSulc/>.

290 Using this approach, here we demonstrate age-related differences in sulcal width



291 and depth, as well as high test-retest reliability. Since individual differences in sulcal  
292 morphology are sufficiently distinct from those characterized by other brain  
293 morphology measures, this approach should complement extant work of investigating  
294 factors that influence brain morphology, e.g., see Figure 3 of Madan and Kensinger  
295 (2018). Given the flexibility in the methodological approach, these measures can be  
296 readily applied to other samples after being initially processed with FreeSurfer.

## 297 **Acknowledgments**

298 MRI data used in the preparation of this article were obtained from several sources,  
299 data were provided in part by: (1) the Open Access Series of Imaging Studies (OASIS)  
300 (Marcus et al., 2007); (2) wave 1 of the Dallas Lifespan Brain Study (DLBS) led by Dr.  
301 Denise Park and distributed through INDI (Mennes et al., 2013) and NITRC (Kennedy  
302 et al., 2016); (3) the Southwest University Adult Lifespan Dataset (SALD) (Wei et al.,  
303 2018), also made available through INDI and hosted on NITRC; and (4) the Center for  
304 Cognition and Brain Disorders (CCBD) (Chen et al., 2015) as dataset HNU1 in the  
305 Consortium for Reliability and Reproducibility (CoRR) (Zuo et al., 2014).

References

306

- 307 Andersen, S. K., Jakobsen, C. E., Pedersen, C. H., Rasmussen, A. M., Plochanski, M., &  
308 Østergaard, L. R. (2015). Classification of Alzheimer's disease from MRI using  
309 sulcal morphology. In *Image analysis* (pp. 103–113). Springer International  
310 Publishing. doi: 10.1007/978-3-319-19665-7\_9
- 311 Andreasen, N. C., Harris, G., Cizadlo, T., Arndt, S., O'Leary, D. S., Swayze, V., & Flaum,  
312 M. (1994). Techniques for measuring sulcal/gyral patterns in the brain as  
313 visualized through magnetic resonance scanning: BRAINPLOT and BRAINMAP.  
314 *Proceedings of the National Academy of Sciences*, 91, 93–97. doi: 10.1073/pnas.91.1.93
- 315
- 316 Asendorpf, J., & Wallbott, H. G. (1979). Maße der Beobachterübereinstimmung: ein  
317 systematischer Vergleich. *Zeitschrift für Sozialpsychologie*, 10, 243–252.
- 318 Auzias, G., Brun, L., Deruelle, C., & Coulon, O. (2015). Deep sulcal landmarks:  
319 Algorithmic and conceptual improvements in the definition and extraction of  
320 sulcal pits. *NeuroImage*, 111, 12–25. doi: 10.1016/j.neuroimage.2015.02.008
- 321 Bartko, J. J. (1966). The intraclass correlation coefficient as a measure of reliability.  
322 *Psychological Reports*, 19, 3–11. doi: 10.2466/pr0.1966.19.1.3
- 323 Beeston, C. J., & Taylor, C. J. (2000). Automatic landmarking of cortical sulci. In *Medical*  
324 *image computing and computer-assisted intervention—MICCAI 2000* (pp. 125–133).  
325 Springer Berlin Heidelberg. doi: 10.1007/978-3-540-40899-4\_13
- 326 Behnke, K. J., Rettmann, M. E., Pham, D. L., Shen, D., Resnick, S. M., Davatzikos, C., &  
327 Prince, J. L. (2003). Automatic classification of sulcal regions of the human brain  
328 cortex using pattern recognition. In M. Sonka & J. M. Fitzpatrick (Eds.), *Medical*  
329 *imaging 2003: Image processing*. SPIE. doi: 10.1117/12.480834
- 330 Cai, K., Xu, H., Guan, H., Zhu, W., Jiang, J., Cui, Y., ... Wen, W. (2017). Identification of  
331 early-stage Alzheimer's disease using sulcal morphology and other common  
332 neuroimaging indices. *PLOS ONE*, 12, e0170875. doi:  
333 10.1371/journal.pone.0170875
- 334 Cao, B., Mwangi, B., Passos, I. C., Wu, M.-J., Keser, Z., Zunta-Soares, G. B., ... Soares,

- 335 J. C. (2017). Lifespan gyrification trajectories of human brain in healthy  
336 individuals and patients with major psychiatric disorders. *Scientific Reports*, *7*,  
337 511. doi: 10.1038/s41598-017-00582-1
- 338 Chan, M. Y., Park, D. C., Savalia, N. K., Petersen, S. E., & Wig, G. S. (2014). Decreased  
339 segregation of brain systems across the healthy adult lifespan. *Proceedings of the*  
340 *National Academy of Sciences USA*, *111*, E4997–E5006. doi:  
341 10.1073/pnas.1415122111
- 342 Chen, B., Xu, T., Zhou, C., Wang, L., Yang, N., Wang, Z., ... Weng, X.-C. (2015).  
343 Individual variability and test-retest reliability revealed by ten repeated  
344 resting-state brain scans over one month. *PLOS ONE*, *10*, e0144963. doi:  
345 10.1371/journal.pone.0144963
- 346 Chen, G., Taylor, P. A., Haller, S. P., Kircanski, K., Stoddard, J., Pine, D. S., ... Cox, R. W.  
347 (2018). Intraclass correlation: Improved modeling approaches and applications  
348 for neuroimaging. *Human Brain Mapping*, *39*, 1187–1206. doi: 10.1002/hbm.23909  
349
- 350 Cicchetti, D. V. (1994). Guidelines, criteria, and rules of thumb for evaluating normed  
351 and standardized assessment instruments in psychology. *Psychological Assessment*,  
352 *6*, 284–290. doi: 10.1037/1040-3590.6.4.284
- 353 Coffey, C. E., Wilkinson, W. E., Parashos, L., Soady, S., Sullivan, R. J., Patterson, L. J., ...  
354 Djang, W. T. (1992). Quantitative cerebral anatomy of the aging human brain: A  
355 cross-sectional study using magnetic resonance imaging. *Neurology*, *42*, 527–527.  
356 doi: 10.1212/wnl.42.3.527
- 357 Destrieux, C., Fischl, B., Dale, A., & Halgren, E. (2010). Automatic parcellation of  
358 human cortical gyri and sulci using standard anatomical nomenclature.  
359 *NeuroImage*, *53*, 1–15. doi: 10.1016/j.neuroimage.2010.06.010
- 360 Drayer, B. P. (1988). Imaging of the aging brain. Part I. normal findings. *Radiology*, *166*,  
361 785–796. doi: 10.1148/radiology.166.3.3277247
- 362 Elkis, H., Friedman, L., Wise, A., & Meltzer, H. Y. (1995). Meta-analyses of studies of  
363 ventricular enlargement and cortical sulcal prominence in mood disorders.

- 364 *Archives of General Psychiatry*, 52, 735. doi: 10.1001/archpsyc.1995.03950210029008
- 365
- 366 Eskildsen, S. F., Uldahl, M., & Ostergaard, L. R. (2005). Extraction of the cerebral  
367 cortical boundaries from MRI for measurement of cortical thickness. In  
368 J. M. Fitzpatrick & J. M. Reinhardt (Eds.), *Medical imaging 2005: Image processing*.  
369 SPIE. doi: 10.1117/12.595145
- 370 Fischl, B. (2012). FreeSurfer. *NeuroImage*, 62, 774–781. doi:  
371 10.1016/j.neuroimage.2012.01.021
- 372 Fischl, B., & Dale, A. M. (2000). Measuring the thickness of the human cerebral cortex  
373 from magnetic resonance images. *Proceedings of the National Academy of Sciences*  
374 *USA*, 97, 11050–11055. doi: 10.1073/pnas.200033797
- 375 Fjell, A. M., Westlye, L. T., Amlie, I., Espeseth, T., Reinvang, I., Raz, N., ... Walhovd,  
376 K. B. (2009). High consistency of regional cortical thinning in aging across  
377 multiple samples. *Cerebral Cortex*, 19, 2001–2012. doi: 10.1093/cercor/bhn232
- 378 Hallgren, K. A. (2012). Computing inter-rater reliability for observational data: An  
379 overview and tutorial. *Tutorials in Quantitative Methods for Psychology*, 8, 23–34.  
380 doi: 10.20982/tqmp.08.1.p023
- 381 Hamelin, L., Bertoux, M., Bottlaender, M., Corne, H., Lagarde, J., Hahn, V., ... Sarazin,  
382 M. (2015). Sulcal morphology as a new imaging marker for the diagnosis of early  
383 onset Alzheimer's disease. *Neurobiology of Aging*, 36, 2932–2939. doi:  
384 10.1016/j.neurobiolaging.2015.04.019
- 385 Hogstrom, L. J., Westlye, L. T., Walhovd, K. B., & Fjell, A. M. (2013). The structure of the  
386 cerebral cortex across adult life: Age-related patterns of surface area, thickness,  
387 and gyrification. *Cerebral Cortex*, 23, 2521–2530. doi: 10.1093/cercor/bhs231
- 388 Huckman, M. S., Fox, J., & Topel, J. (1975). The validity of criteria for the evaluation of  
389 cerebral atrophy by computed tomography. *Radiology*, 116, 85–92. doi:  
390 10.1148/116.1.85
- 391 Hutton, C., Draganski, B., Ashburner, J., & Weiskopf, N. (2009). A comparison between  
392 voxel-based cortical thickness and voxel-based morphometry in normal aging.

- 393 *NeuroImage*, 48, 371–380. doi: 10.1016/j.neuroimage.2009.06.043
- 394 Im, K., Jo, H. J., Mangin, J.-F., Evans, A. C., Kim, S. I., & Lee, J.-M. (2010). Spatial  
395 distribution of deep sulcal landmarks and hemispherical asymmetry on the  
396 cortical surface. *Cerebral Cortex*, 20, 602–611. doi: 10.1093/cercor/bhp127
- 397 Jacoby, R. J., Levy, R., & Dawson, J. M. (1980). Computed tomography in the elderly: I.  
398 The normal population. *British Journal of Psychiatry*, 136, 249–255. doi:  
399 10.1192/bjp.136.3.249
- 400 John, J. P., Wang, L., Moffitt, A. J., Singh, H. K., Gado, M. H., & Csernansky, J. G. (2006).  
401 Inter-rater reliability of manual segmentation of the superior, inferior and middle  
402 frontal gyri. *Psychiatry Research: Neuroimaging*, 148, 151–163. doi:  
403 10.1016/j.psychresns.2006.05.006
- 404 Jones, S. E., Buchbinder, B. R., & Aharon, I. (2000). Three-dimensional mapping of  
405 cortical thickness using Laplace's equation. *Human Brain Mapping*, 11, 12–32. doi:  
406 10.1002/1097-0193(200009)11:1<12::aid-hbm20>3.0.co;2-k
- 407 Kennedy, D. N., Haselgrove, C., Riehl, J., Preuss, N., & Buccigrossi, R. (2016). The  
408 NITRC image repository. *NeuroImage*, 124, 1069–1073. doi:  
409 10.1016/j.neuroimage.2015.05.074
- 410 Kennedy, K. M., Rodrigue, K. M., Bischof, G. N., Hebrank, A. C., Reuter-Lorenz, P. A.,  
411 & Park, D. C. (2015). Age trajectories of functional activation under conditions of  
412 low and high processing demands: An adult lifespan fMRI study of the aging  
413 brain. *NeuroImage*, 104, 21–34. doi: 10.1016/j.neuroimage.2014.09.056
- 414 Kippenhan, J. S., Olsen, R. K., Mervis, C. B., Morris, C. A., Kohn, P., Meyer-Lindenberg,  
415 A., & Berman, K. F. (2005). Genetic contributions to human gyrification: Sulcal  
416 morphometry in Williams syndrome. *Journal of Neuroscience*, 25, 7840–7846. doi:  
417 10.1523/jneurosci.1722-05.2005
- 418 Kochunov, P., Fox, P., Lancaster, J., Tan, L. H., Amunts, K., Zilles, K., ... Gao, J. H.  
419 (2003). Localized morphological brain differences between english-speaking  
420 caucasians and chinese-speaking asians: new evidence of anatomical plasticity.  
421 *NeuroReport*, 14, 961–964. doi: 10.1097/01.wnr.0000075417.59944.00

- 422 Kochunov, P., Mangin, J.-F., Coyle, T., Lancaster, J., Thompson, P., Rivière, D., . . . Fox,  
423 P. T. (2005). Age-related morphology trends of cortical sulci. *Human Brain*  
424 *Mapping*, 26, 210–220. doi: 10.1002/hbm.20198
- 425 Kochunov, P., Rogers, W., Mangin, J.-F., & Lancaster, J. (2012). A library of cortical  
426 morphology analysis tools to study development, aging and genetics of cerebral  
427 cortex. *Neuroinformatics*, 10, 81–96. doi: 10.1007/s12021-011-9127-9
- 428 Kochunov, P., Thompson, P. M., Coyle, T. R., Lancaster, J. L., Kochunov, V., Royall, D.,  
429 . . . Fox, P. T. (2008). Relationship among neuroimaging indices of cerebral health  
430 during normal aging. *Human Brain Mapping*, 29, 36–45. doi: 10.1002/hbm.20369
- 431 Koo, T. K., & Li, M. Y. (2016). A guideline of selecting and reporting intraclass  
432 correlation coefficients for reliability research. *Journal of Chiropractic Medicine*, 15,  
433 155–163. doi: 10.1016/j.jcm.2016.02.012
- 434 Laffey, P. A., Peyster, R. G., Nathan, R., Haskin, M. E., & McGinley, J. A. (1984).  
435 Computed tomography and aging: Results in a normal elderly population.  
436 *Neuroradiology*, 26, 273–278. doi: 10.1007/BF00339770
- 437 Lamont, A. J., Mortby, M. E., Anstey, K. J., Sachdev, P. S., & Cherbuin, N. (2014). Using  
438 sulcal and gyral measures of brain structure to investigate benefits of an active  
439 lifestyle. *NeuroImage*, 91, 353–359. doi: 10.1016/j.neuroimage.2014.01.008
- 440 Largen, J. W., Smith, R. C., Calderon, M., Baumgartner, R., Lu, R. B., Schoolar, J. C., &  
441 Ravichandran, G. K. (1984). Abnormalities of brain structure and density in  
442 schizophrenia. *Biological Psychiatry*, 19, 991–1013.
- 443 Le Goualher, G., Barillot, C., Bizais, Y. J., & Scarabin, J.-M. (1996). Three-dimensional  
444 segmentation of cortical sulci using active models. In M. H. Loew &  
445 K. M. Hanson (Eds.), *Medical imaging 1996: Image processing*. SPIE. doi:  
446 10.1117/12.237928
- 447 Le Goualher, G., Collins, D. L., Barillot, C., & Evans, A. C. (1998). Automatic  
448 identificaion of cortical sulci using a 3d probabilistic atlas. In *Medical image*  
449 *computing and computer-assisted intervention – MICCAI’98* (pp. 509–518). Springer  
450 Berlin Heidelberg. doi: 10.1007/bfb0056236

- 451 Lee, J. K., Lee, J.-M., Kim, J. S., Kim, I. Y., Evans, A. C., & Kim, S. I. (2006). A novel  
452 quantitative cross-validation of different cortical surface reconstruction  
453 algorithms using MRI phantom. *NeuroImage*, *31*, 572–584. doi:  
454 10.1016/j.neuroimage.2005.12.044
- 455 Lemaitre, H., Goldman, A. L., Sambataro, F., Verchinski, B. A., Meyer-Lindenberg, A.,  
456 Weinberger, D. R., & Mattay, V. S. (2012). Normal age-related brain  
457 morphometric changes: nonuniformity across cortical thickness, surface area and  
458 gray matter volume? *Neurobiology of Aging*, *33*, 617.e1–617.e9. doi:  
459 10.1016/j.neurobiolaging.2010.07.013
- 460 Leong, R. L., Lo, J. C., Sim, S. K., Zheng, H., Tandi, J., Zhou, J., & Chee, M. W. (2017).  
461 Longitudinal brain structure and cognitive changes over 8 years in an east asian  
462 cohort. *NeuroImage*, *147*, 852–860. doi: 10.1016/j.neuroimage.2016.10.016
- 463 Li, G., Liu, T., Nie, J., Guo, L., & Wong, S. T. C. (2008). A novel method for cortical  
464 sulcal fundi extraction. In *Medical image computing and computer-assisted  
465 intervention–MICCAI 2008* (pp. 270–278). Springer Berlin Heidelberg. doi:  
466 10.1007/978-3-540-85988-8\_33
- 467 Liu, T., Lipnicki, D. M., Zhu, W., Tao, D., Zhang, C., Cui, Y., ... Wen, W. (2012). Cortical  
468 gyrification and sulcal spans in early stage Alzheimer's disease. *PLOS ONE*, *7*,  
469 e31083. doi: 10.1371/journal.pone.0031083
- 470 Liu, T., Sachdev, P. S., Lipnicki, D. M., Jiang, J., Geng, G., Zhu, W., ... Wen, W. (2013).  
471 Limited relationships between two-year changes in sulcal morphology and other  
472 common neuroimaging indices in the elderly. *NeuroImage*, *83*, 12–17. doi:  
473 10.1016/j.neuroimage.2013.06.058
- 474 Liu, T., Wen, W., Zhu, W., Kochan, N. A., Trollor, J. N., Reppermund, S., ... Sachdev,  
475 P. S. (2011). The relationship between cortical sulcal variability and cognitive  
476 performance in the elderly. *NeuroImage*, *56*, 865–873. doi:  
477 10.1016/j.neuroimage.2011.03.015
- 478 Liu, T., Wen, W., Zhu, W., Trollor, J., Reppermund, S., Crawford, J., ... Sachdev, P.  
479 (2010). The effects of age and sex on cortical sulci in the elderly. *NeuroImage*, *51*,



- 480 19–27. doi: 10.1016/j.neuroimage.2010.02.016
- 481 Lohmann, G., & von Cramon, D. Y. (2000). Automatic labelling of the human cortical  
482 surface using sulcal basins. *Medical Image Analysis*, 4, 179–188. doi:  
483 10.1016/s1361-8415(00)00024-4
- 484 Lohmann, G., von Cramon, D. Y., & Colchester, A. C. F. (2008). Deep sulcal landmarks  
485 provide an organizing framework for human cortical folding. *Cerebral Cortex*, 18,  
486 1415–1420. doi: 10.1093/cercor/bhm174
- 487 Madan, C. R. (2017). Advances in studying brain morphology: The benefits of  
488 open-access data. *Frontiers in Human Neuroscience*, 11, 405. doi:  
489 10.3389/fnhum.2017.00405
- 490 Madan, C. R. (2018a). Age differences in head motion and estimates of cortical  
491 morphology. *PeerJ*, 6, e5176.
- 492 Madan, C. R. (2018b). Shape-related characteristics of age-related differences in  
493 subcortical structures. *Aging & Mental Health*. doi:  
494 10.1080/13607863.2017.1421613
- 495 Madan, C. R., & Kensinger, E. A. (2016). Cortical complexity as a measure of  
496 age-related brain atrophy. *NeuroImage*, 134, 617–629. doi:  
497 10.1016/j.neuroimage.2016.04.029
- 498 Madan, C. R., & Kensinger, E. A. (2017a). Age-related differences in the structural  
499 complexity of subcortical and ventricular structures. *Neurobiology of Aging*, 50,  
500 87–95. doi: 10.1016/j.neurobiolaging.2016.10.023
- 501 Madan, C. R., & Kensinger, E. A. (2017b). Test–retest reliability of brain morphology  
502 estimates. *Brain Informatics*, 4, 107–121. doi: 10.1007/s40708-016-0060-4
- 503 Madan, C. R., & Kensinger, E. A. (2018). Predicting age from cortical structure across  
504 the lifespan. *European Journal of Neuroscience*, 47, 399–416. doi: 10.1111/ejn.13835
- 505 Mangin, J.-F., Riviere, D., Cachia, A., Duchesnay, E., Cointepas, Y.,  
506 Papadopoulos-Orfanos, D., ... Regis, J. (2004). Object-based morphometry of the  
507 cerebral cortex. *IEEE Transactions on Medical Imaging*, 23, 968–982. doi:  
508 10.1109/tmi.2004.831204

- 509 Mangin, J.-F., Rivière, D., Coulon, O., Poupon, C., Cachia, A., Cointepas, Y., ...  
510 Papadopoulos-Orfanos, D. (2004). Coordinate-based versus structural  
511 approaches to brain image analysis. *Artificial Intelligence in Medicine*, *30*, 177–197.  
512 doi: 10.1016/s0933-3657(03)00064-2
- 513 Marcus, D. S., Wang, T. H., Parker, J., Csernansky, J. G., Morris, J. C., & Buckner, R. L.  
514 (2007). Open Access Series of Imaging Studies (OASIS): Cross-sectional MRI data  
515 in young, middle aged, nondemented, and demented older adults. *Journal of*  
516 *Cognitive Neuroscience*, *19*, 1498–1507. doi: 10.1162/jocn.2007.19.9.1498
- 517 McGraw, K. O., & Wong, S. P. (1996). Forming inferences about some intraclass  
518 correlation coefficients. *Psychological Methods*, *1*, 30–46. doi:  
519 10.1037/1082-989x.1.1.30
- 520 McKay, D. R., Knowles, E. E. M., Winkler, A. A. M., Sprooten, E., Kochunov, P., Olvera,  
521 R. L., ... Glahn, D. C. (2014). Influence of age, sex and genetic factors on the  
522 human brain. *Brain Imaging and Behavior*, *8*, 143–152. doi:  
523 10.1007/s11682-013-9277-5
- 524 Mennes, M., Biswal, B. B., Castellanos, F. X., & Milham, M. P. (2013). Making data  
525 sharing work: The FCP/INDI experience. *NeuroImage*, *82*, 683–691. doi:  
526 10.1016/j.neuroimage.2012.10.064
- 527 Mikhael, S., Hoogendoorn, C., Valdes-Hernandez, M., & Pernet, C. (2018). A critical  
528 analysis of neuroanatomical software protocols reveals clinically relevant  
529 differences in parcellation schemes. *NeuroImage*, *170*, 348–364. doi:  
530 10.1016/j.neuroimage.2017.02.082
- 531 Ming, J., Harms, M. P., Morris, J. C., Beg, M. F., & Wang, L. (2015). Integrated cortical  
532 structural marker for Alzheimer's disease. *Neurobiology of Aging*, *36*, S53–S59. doi:  
533 10.1016/j.neurobiolaging.2014.03.042
- 534 Nowinski, W. L., Raphel, J. K., & Nguyen, B. T. (1996). Atlas-based identification of  
535 cortical sulci. In Y. Kim (Ed.), *Medical imaging 1996: Image display*. SPIE. doi:  
536 10.1117/12.238488
- 537 Oguz, I., Cates, J., Fletcher, T., Whitaker, R., Cool, D., Aylward, S., & Styner, M. (2008).

- 538 Cortical correspondence using entropy-based particle systems and local features.  
539 In *2008 5th IEEE International Symposium on Biomedical Imaging: From nano to*  
540 *macro*. IEEE. doi: 10.1109/isbi.2008.4541327
- 541 Ono, M., Kubick, S., & Abernathy, C. D. (1990). *Atlas of the cerebral sulci*. Thieme.
- 542 Palaniyappan, L., Park, B., Balain, V., Dangi, R., & Liddle, P. (2015). Abnormalities in  
543 structural covariance of cortical gyrification in schizophrenia. *Brain Structure and*  
544 *Function*, 220, 2059–2071. doi: 10.1007/s00429-014-0772-2
- 545 Pasquier, F., Leys, D., Weerts, J. G., Mounier-Vehier, F., Barkhof, F., & Scheltens, P.  
546 (1996). Inter-and intraobserver reproducibility of cerebral atrophy assessment on  
547 MRI scans with hemispheric infarcts. *European Neurology*, 36, 268–272. doi:  
548 10.1159/000117270
- 549 Perrot, M., Rivière, D., & Mangin, J.-F. (2011). Cortical sulci recognition and spatial  
550 normalization. *Medical Image Analysis*, 15, 529–550. doi:  
551 10.1016/j.media.2011.02.008
- 552 Pizzagalli, F., Auzias, G., Kochunov, P., Faskowitz, J. I., Thompson, P. M., & Jahanshad,  
553 N. (2017). The core genetic network underlying sulcal morphometry. In  
554 E. Romero, N. Lepore, J. Brieva, & I. Larrabide (Eds.), *12th international symposium*  
555 *on medical information processing and analysis*. SPIE. doi: 10.1117/12.2256959
- 556 Plocharski, M., & Østergaard, L. R. (2016). Extraction of sulcal medial surface and  
557 classification of Alzheimer’s disease using sulcal features. *Computer Methods and*  
558 *Programs in Biomedicine*, 133, 35–44. doi: 10.1016/j.cmpb.2016.05.009
- 559 Rajaratnam, N. (1960). Reliability formulas for independent decision data when  
560 reliability data are matched. *Psychometrika*, 25, 261–271. doi: 10.1007/bf02289730
- 561 Reiner, P., Jouvent, E., Duchesnay, E., Cuingnet, R., Mangin, J.-F., & Chabriat, H. (2012).  
562 Sulcal span in Alzheimer’s disease, amnesic mild cognitive impairment, and  
563 healthy controls. *Journal of Alzheimer’s Disease*, 29, 605–613. doi:  
564 10.3233/JAD-2012-111622
- 565 Rieder, R. O., Donnelly, E. F., Herdt, J. R., & Waldman, I. N. (1979). Sulcal prominence  
566 in young chronic schizophrenic patients: CT scan findings associated with

- 567       impairment on neuropsychological tests. *Psychiatry Research*, 1, 1–8. doi:  
568       10.1016/0165-1781(79)90021-0
- 569 Rivièrè, D., Mangin, J.-F., Papadopoulos-Orfanos, D., Martinez, J.-M., Frouin, V., &  
570       Régis, J. (2002). Automatic recognition of cortical sulci of the human brain using  
571       a congregation of neural networks. *Medical Image Analysis*, 6, 77–92. doi:  
572       10.1016/s1361-8415(02)00052-x
- 573 Royackkers, N., Desvignes, M., Fawal, H., & Revenu, M. (1999). Detection and  
574       statistical analysis of human cortical sulci. *NeuroImage*, 10, 625–641. doi:  
575       10.1006/nimg.1999.0512
- 576 Salat, D. H., Buckner, R. L., Snyder, A. Z., Greve, D. N., Desikan, R. S. R., Busa, E., . . .  
577       Fischl, B. (2004). Thinning of the cerebral cortex in aging. *Cerebral Cortex*, 14,  
578       721–730. doi: 10.1093/cercor/bhh032
- 579 Schaer, M., Cuadra, M. B., Schmansky, N., Fischl, B., Thiran, J.-P., & Eliez, S. (2012).  
580       How to measure cortical folding from MR images: A step-by-step tutorial to  
581       compute local gyrification index. *Journal of Visualized Experiments*, e3417. doi:  
582       10.3791/3417
- 583 Scheltens, P., Pasquier, F., Weerts, J. G., Barkhof, F., & Leys, D. (1997). Qualitative  
584       assessment of cerebral atrophy on MRI: Inter- and intra-observer reproducibility  
585       in dementia and normal aging. *European Neurology*, 37, 95–99. doi:  
586       10.1159/000117417
- 587 Shrout, P. E., & Fleiss, J. L. (1979). Intraclass correlations: Uses in assessing rater  
588       reliability. *Psychological Bulletin*, 86, 420–428. doi: 10.1037/0033-2909.86.2.420
- 589 Sowell, E. R., Peterson, B. S., Kan, E., Woods, R. P., Yoshii, J., Bansal, R., . . . Toga, A. W.  
590       (2007). Sex differences in cortical thickness mapped in 176 healthy individuals  
591       between 7 and 87 years of age. *Cerebral Cortex*, 17, 1550–1560. doi:  
592       10.1093/cercor/bhl066
- 593 Sowell, E. R., Peterson, B. S., Thompson, P. M., Welcome, S. E., Henkenius, A. L., &  
594       Toga, A. W. (2003). Mapping cortical change across the human life span. *Nature*  
595       *Neuroscience*, 6, 309–315. doi: 10.1038/nn1008

- 596 Tang, Y., Hojatkashani, C., Dinov, I. D., Sun, B., Fan, L., Lin, X., . . . Toga, A. W. (2010).  
597 The construction of a chinese MRI brain atlas: A morphometric comparison study  
598 between chinese and caucasian cohorts. *NeuroImage*, *51*, 33–41. doi:  
599 10.1016/j.neuroimage.2010.01.111
- 600 Thompson, P. M., Schwartz, C., Lin, R. T., Khan, A. A., & Toga, A. W. (1996).  
601 Three-dimensional statistical analysis of sulcal variability in the human brain.  
602 *Journal of Neuroscience*, *16*, 4261–4274. doi: 10.1523/jneurosci.16-13-04261.1996
- 603 Tomlinson, B., Blessed, G., & Roth, M. (1968). Observations on the brains of  
604 non-demented old people. *Journal of the Neurological Sciences*, *7*, 331–356. doi:  
605 10.1016/0022-510x(68)90154-8
- 606 Vaillant, M., & Davatzikos, C. (1997). Finding parametric representations of the cortical  
607 sulci using an active contour model. *Medical Image Analysis*, *1*, 295–315. doi:  
608 10.1016/s1361-8415(97)85003-7
- 609 Walhovd, K. B., Westlye, L. T., Amlien, I., Espeseth, T., Reinvang, I., Raz, N., . . . Fjell,  
610 A. M. (2011). Consistent neuroanatomical age-related volume differences across  
611 multiple samples. *Neurobiology of Aging*, *32*, 916–932. doi:  
612 10.1016/j.neurobiolaging.2009.05.013
- 613 Wei, D., Zhuang, K., Ai, L., Chen, Q., Yang, W., Liu, W., . . . Qiu, J. (2018). Structural  
614 and functional brain scans from the cross-sectional southwest university adult  
615 lifespan dataset. *Scientific Data*, *5*, 180134. doi: 10.1038/sdata.2018.134
- 616 Welker, W. (1990). Why does cerebral cortex fissure and fold? In E. G. Jones &  
617 A. Peters (Eds.), *Cerebral cortex* (Vol. 8B, pp. 3–136). Springer US. doi:  
618 10.1007/978-1-4615-3824-0\_1
- 619 Yue, N. C., Arnold, A. M., Longstreth, W. T., Elster, A. D., Jungreis, C. A., O'Leary,  
620 D. H., . . . Bryan, R. N. (1997). Sulcal, ventricular, and white matter changes at  
621 MR imaging in the aging brain: Data from the cardiovascular health study.  
622 *Radiology*, *202*, 33–39. doi: 10.1148/radiology.202.1.8988189
- 623 Yun, H. J., Im, K., Yang, J.-J., Yoon, U., & Lee, J.-M. (2013). Automated sulcal depth  
624 measurement on cortical surface reflecting geometrical properties of sulci. *PLOS*

625 *ONE*, 8, e55977. doi: 10.1371/journal.pone.0055977  
626 Zuo, X.-N., Anderson, J. S., Bellec, P., Birn, R. M., Biswal, B. B., Blautzik, J., ... Milham,  
627 M. P. (2014). An open science resource for establishing reliability and  
628 reproducibility in functional connectomics. *Scientific Data*, 1, 140049. doi:  
629 10.1038/sdata.2014.49
